# Supplementary material
Source: PubMed Central journal article supplement (PMC5885214)
Supplement: jamaoncol-4-516-s001.pdf [file jamaoncol-4-516-s001.pdf]

## Supplementary Online Content

Michels KA, Pfeiffer RM, Brinton LA, Trabert B. Modification of the associations between duration of oral contraceptive use and ovarian, endometrial, breast, and colorectal cancers. *JAMA Oncol*. Published online January 18, 2018. doi:10.1001/jamaoncol.2017.4942

**eTable.** Characteristics of the NIH-AARP Diet and Health Study population across categories of duration of oral contraceptive use

**eFigure 1.** Oral contraceptive use duration and time to ovarian cancer diagnosis across lifestyle characteristics

**eFigure 2.** Oral contraceptive use duration and time to endometrial cancer diagnosis across lifestyle characteristics

**eFigure 3.** Oral contraceptive use duration and time to breast cancer diagnosis across lifestyle characteristics

**eFigure 4.** Oral contraceptive use duration and time to colorectal cancer diagnosis across lifestyle characteristics

**eFigure 5.** Oral contraceptive use duration and time to breast (A), colorectal (B), or ovarian (C) cancer diagnosis across family history

This supplementary material has been provided by the authors to give readers additional information about their work.

**eTable. Characteristics of the NIH-AARP Diet and Health Study population across categories of duration of oral contraceptive use**

|                                                   | Duration of Oral Contraceptive Use |      |              |      |              |      |                  |      |
|---------------------------------------------------|------------------------------------|------|--------------|------|--------------|------|------------------|------|
|                                                   | No use or up to 1 year             |      | 1 to 4 years |      | 5 to 9 years |      | 10 or more years |      |
|                                                   | n                                  | %    | n            | %    | n            | %    | n                | %    |
| <b>Age, years<sup>a</sup></b><br>median [IQR]     | 64 [60-67]                         |      | 59 [55-64]   |      | 59 [55-64]   |      | 60 [56-64]       |      |
| <b>Race</b>                                       |                                    |      |              |      |              |      |                  |      |
| White                                             | 105,285                            | 90.4 | 31,156       | 90.6 | 22,121       | 91.2 | 17,152           | 91.5 |
| Black                                             | 6,608                              | 5.7  | 2,067        | 6.0  | 1,438        | 5.9  | 1,117            | 6.0  |
| Other                                             | 4,530                              | 3.9  | 1,184        | 3.4  | 689          | 2.8  | 469              | 2.5  |
| <b>Education</b>                                  |                                    |      |              |      |              |      |                  |      |
| Did not complete High School                      | 8,972                              | 7.9  | 1,593        | 4.7  | 959          | 4.0  | 669              | 3.6  |
| High School                                       | 33,332                             | 29.2 | 7,525        | 22.2 | 5,232        | 21.9 | 3,912            | 21.2 |
| Some college/post High School                     | 40,286                             | 35.3 | 12,842       | 37.9 | 9,273        | 38.8 | 7,218            | 39.0 |
| College                                           | 15,919                             | 14.0 | 5,816        | 17.2 | 4,070        | 17.0 | 3,120            | 16.9 |
| Post graduate                                     | 15,584                             | 13.7 | 6,071        | 17.9 | 4,343        | 18.2 | 3,577            | 19.3 |
| <b>Age at menarche</b>                            |                                    |      |              |      |              |      |                  |      |
| 12 years or younger                               | 57,460                             | 48.8 | 17,343       | 49.9 | 12,002       | 49.0 | 9,259            | 48.9 |
| 13 to 14 years                                    | 49,035                             | 41.6 | 14,297       | 41.1 | 10,341       | 42.2 | 7,791            | 41.2 |
| 15 years or older                                 | 11,273                             | 9.6  | 3,135        | 9.0  | 2,166        | 8.8  | 1,873            | 9.9  |
| <b>Menopausal status</b>                          |                                    |      |              |      |              |      |                  |      |
| Pre-menopausal                                    | 2,224                              | 1.9  | 2,256        | 6.5  | 1,606        | 6.6  | 1,130            | 6.0  |
| Post-menopausal                                   | 115,568                            | 98.1 | 32,492       | 93.5 | 22,881       | 93.4 | 17,758           | 94.0 |
| <b>Smoking Status</b>                             |                                    |      |              |      |              |      |                  |      |
| Non-smoker                                        | 54,778                             | 47.8 | 14,605       | 43.2 | 9,914        | 41.5 | 7,794            | 42.3 |
| Former smoker                                     | 43,728                             | 38.2 | 13,814       | 40.8 | 10,201       | 42.7 | 7,927            | 43.0 |
| Current smoker                                    | 16,065                             | 14.0 | 5,424        | 16.0 | 3,753        | 15.7 | 2,722            | 14.8 |
| <b>Current alcohol use</b>                        |                                    |      |              |      |              |      |                  |      |
| Non-drinker                                       | 38,421                             | 32.7 | 9,167        | 26.4 | 5,799        | 23.7 | 4,080            | 21.6 |
| Less than or equal to 2 servings per day          | 74,038                             | 63.0 | 23,797       | 68.5 | 17,259       | 70.5 | 13,558           | 71.7 |
| Greater than 2 servings per day                   | 5,100                              | 4.3  | 1,789        | 5.1  | 1,429        | 5.8  | 1,279            | 6.8  |
| <b>Current Body mass index (kg/m<sup>2</sup>)</b> |                                    |      |              |      |              |      |                  |      |
| Less than 25                                      | 48,467                             | 42.5 | 15,214       | 44.9 | 11,301       | 47.2 | 9,147            | 49.3 |

|                                                      |         |      |        |      |        |      |        |      |
|------------------------------------------------------|---------|------|--------|------|--------|------|--------|------|
| 25 to 29                                             | 37,654  | 33.0 | 10,788 | 31.8 | 7,609  | 31.8 | 5,830  | 31.4 |
| 30 or greater                                        | 27,867  | 24.4 | 7,915  | 23.3 | 5,018  | 21.0 | 3,562  | 19.2 |
| <b>Current physical activity</b>                     |         |      |        |      |        |      |        |      |
| 3 or more times per week                             | 48,368  | 41.5 | 14,245 | 41.2 | 10,105 | 41.5 | 8,093  | 43.0 |
| 1 to 2 times per week                                | 24,067  | 20.6 | 7,587  | 22.0 | 5,417  | 22.3 | 4,115  | 21.9 |
| 3 times per month or less                            | 44,149  | 37.9 | 12,709 | 36.8 | 8,823  | 36.2 | 6,598  | 35.1 |
| <b>Has first degree relative with breast cancer</b>  |         |      |        |      |        |      |        |      |
| No                                                   | 98,138  | 87.0 | 29,082 | 87.2 | 20,499 | 87.1 | 15,930 | 87.6 |
| Yes                                                  | 14,606  | 13.0 | 4,258  | 12.8 | 3,025  | 12.9 | 2,265  | 12.5 |
| <b>Has first degree relative with colon cancer</b>   |         |      |        |      |        |      |        |      |
| No                                                   | 101,351 | 89.9 | 30,072 | 90.2 | 21,312 | 90.6 | 16,482 | 90.6 |
| Yes                                                  | 11,393  | 10.1 | 3,268  | 9.8  | 2,212  | 9.4  | 1,713  | 9.4  |
| <b>Has first degree relative with ovarian cancer</b> |         |      |        |      |        |      |        |      |
| No                                                   | 41,727  | 93.2 | 13,265 | 93.7 | 9,659  | 94.2 | 7,541  | 93.3 |
| Yes                                                  | 3,046   | 6.8  | 885    | 6.3  | 593    | 5.8  | 538    | 6.7  |

n=number, IQR=interquartile range, kg/m<sup>2</sup>=kilograms per meter<sup>2</sup>

Characteristics reflect the analytic population prior to exclusions for specific cancer analyses (e.g., women with bilateral oophorectomy were excluded from Cox models for ovarian cancer).

Percentages in the table refer to proportions of the population who were not missing information on a given covariate. Missingness was less than 5% for all covariates, except family history of ovarian cancer, which was available for 51% of the population.

**eFigure 1.** Oral contraceptive use duration and time to ovarian cancer diagnosis across lifestyle characteristics

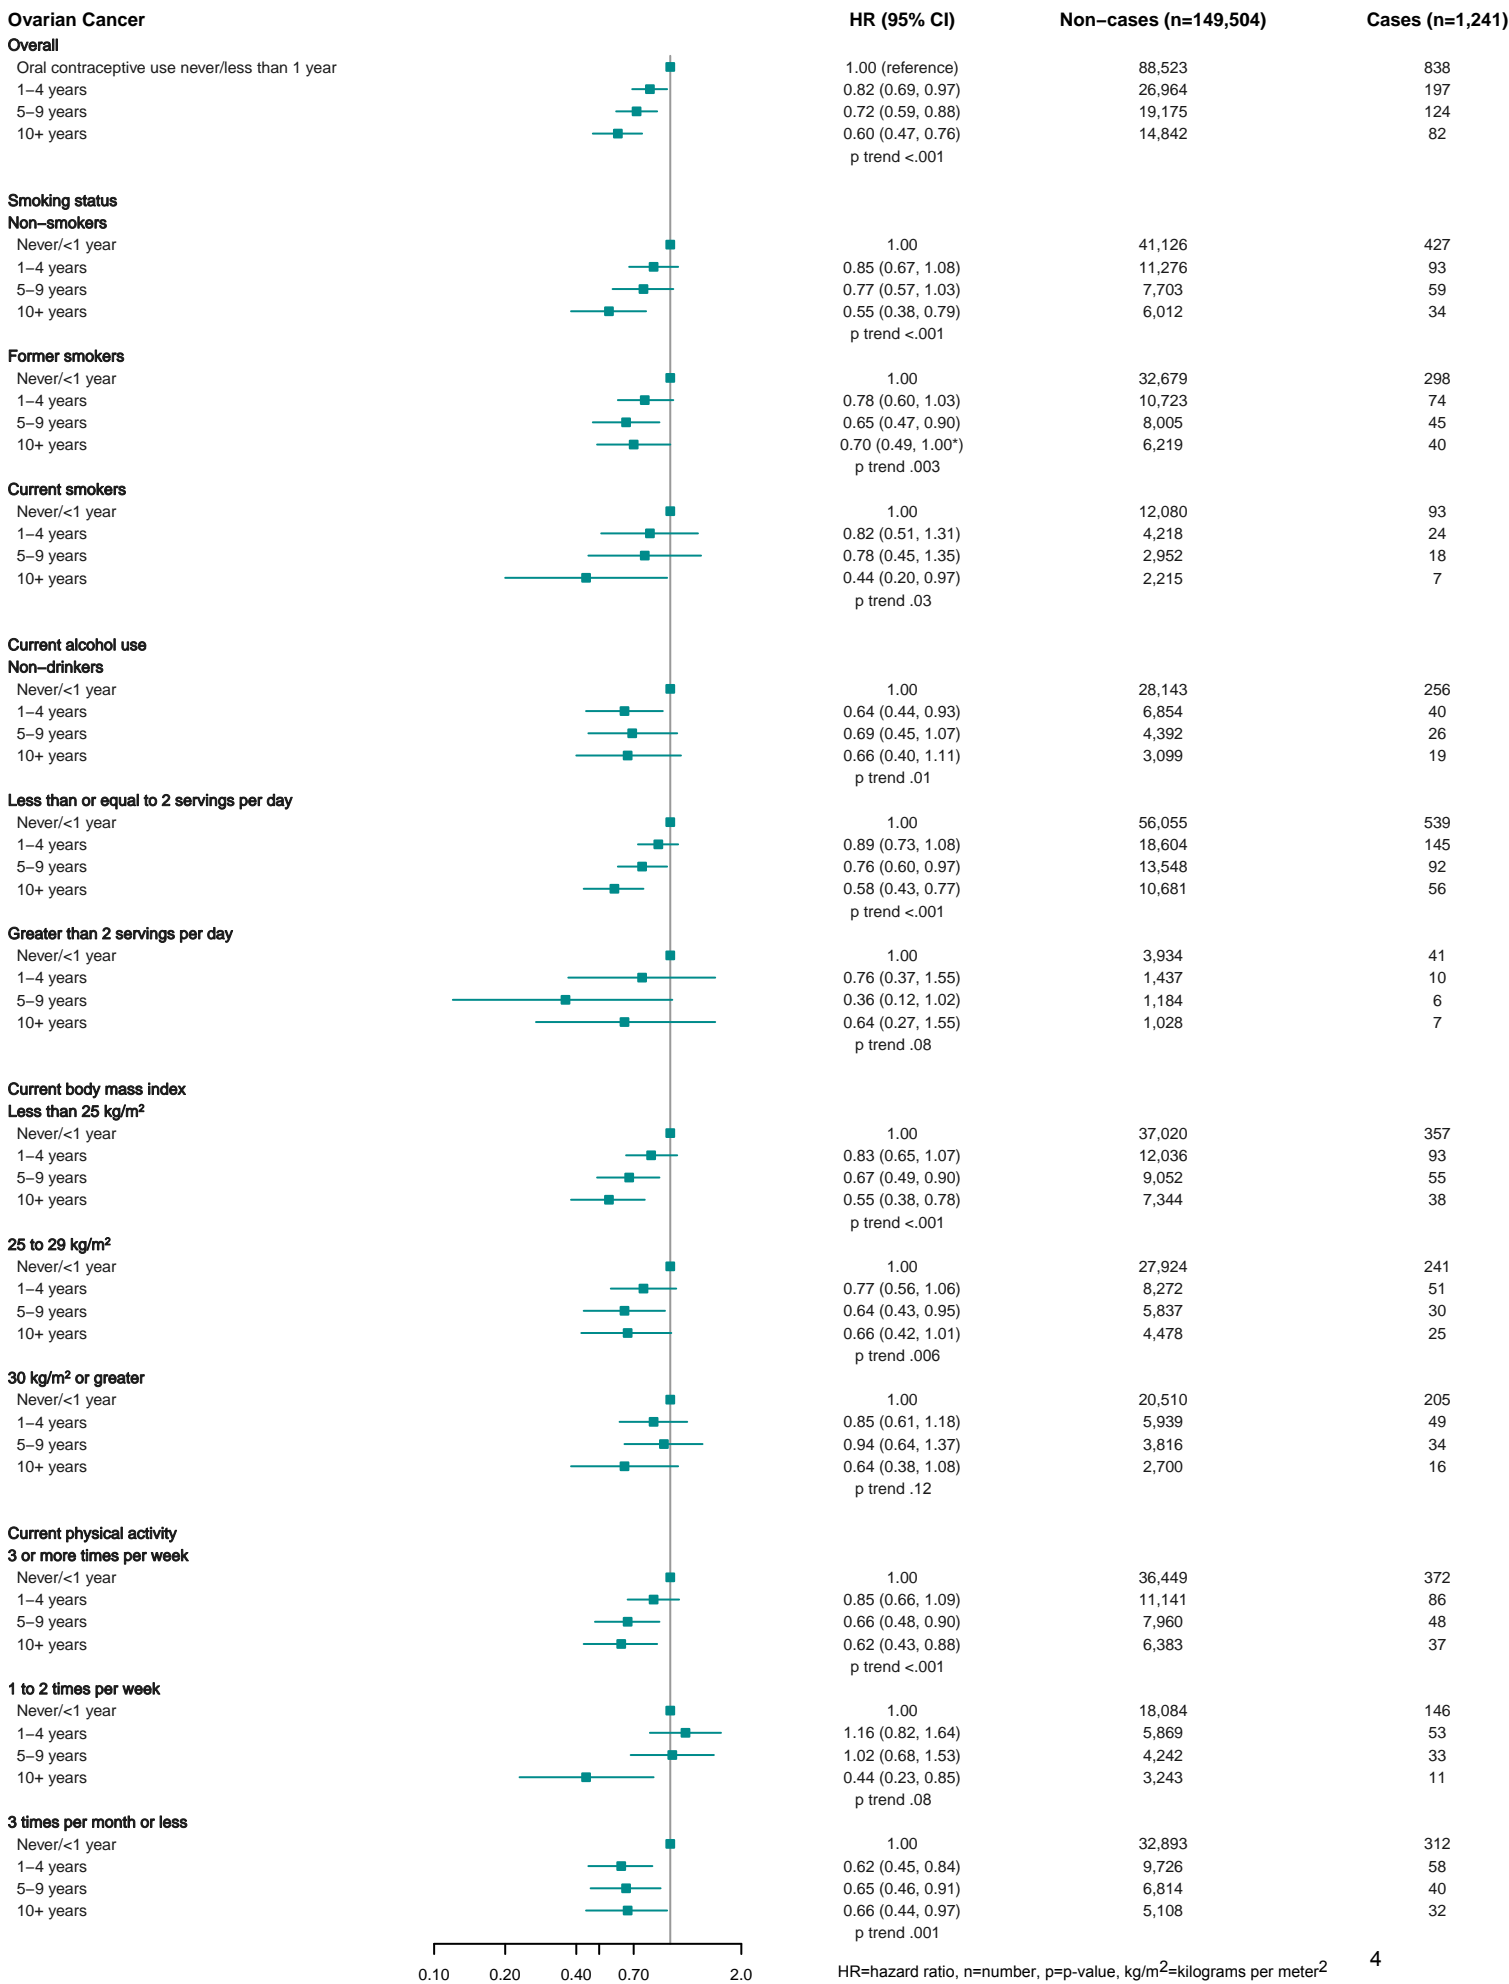

HR=hazard ratio, n=number, p=p-value, kg/m<sup>2</sup>=kilograms per meter<sup>2</sup>

\*Statistically significant at alpha=0.05. Data are from the NIH-AARP Diet and Health Study. Prior oral contraceptive use and lifestyle factors queried at baseline (age 50-71).

**eFigure 2.** Oral contraceptive use duration and time to endometrial cancer diagnosis across lifestyle characteristics

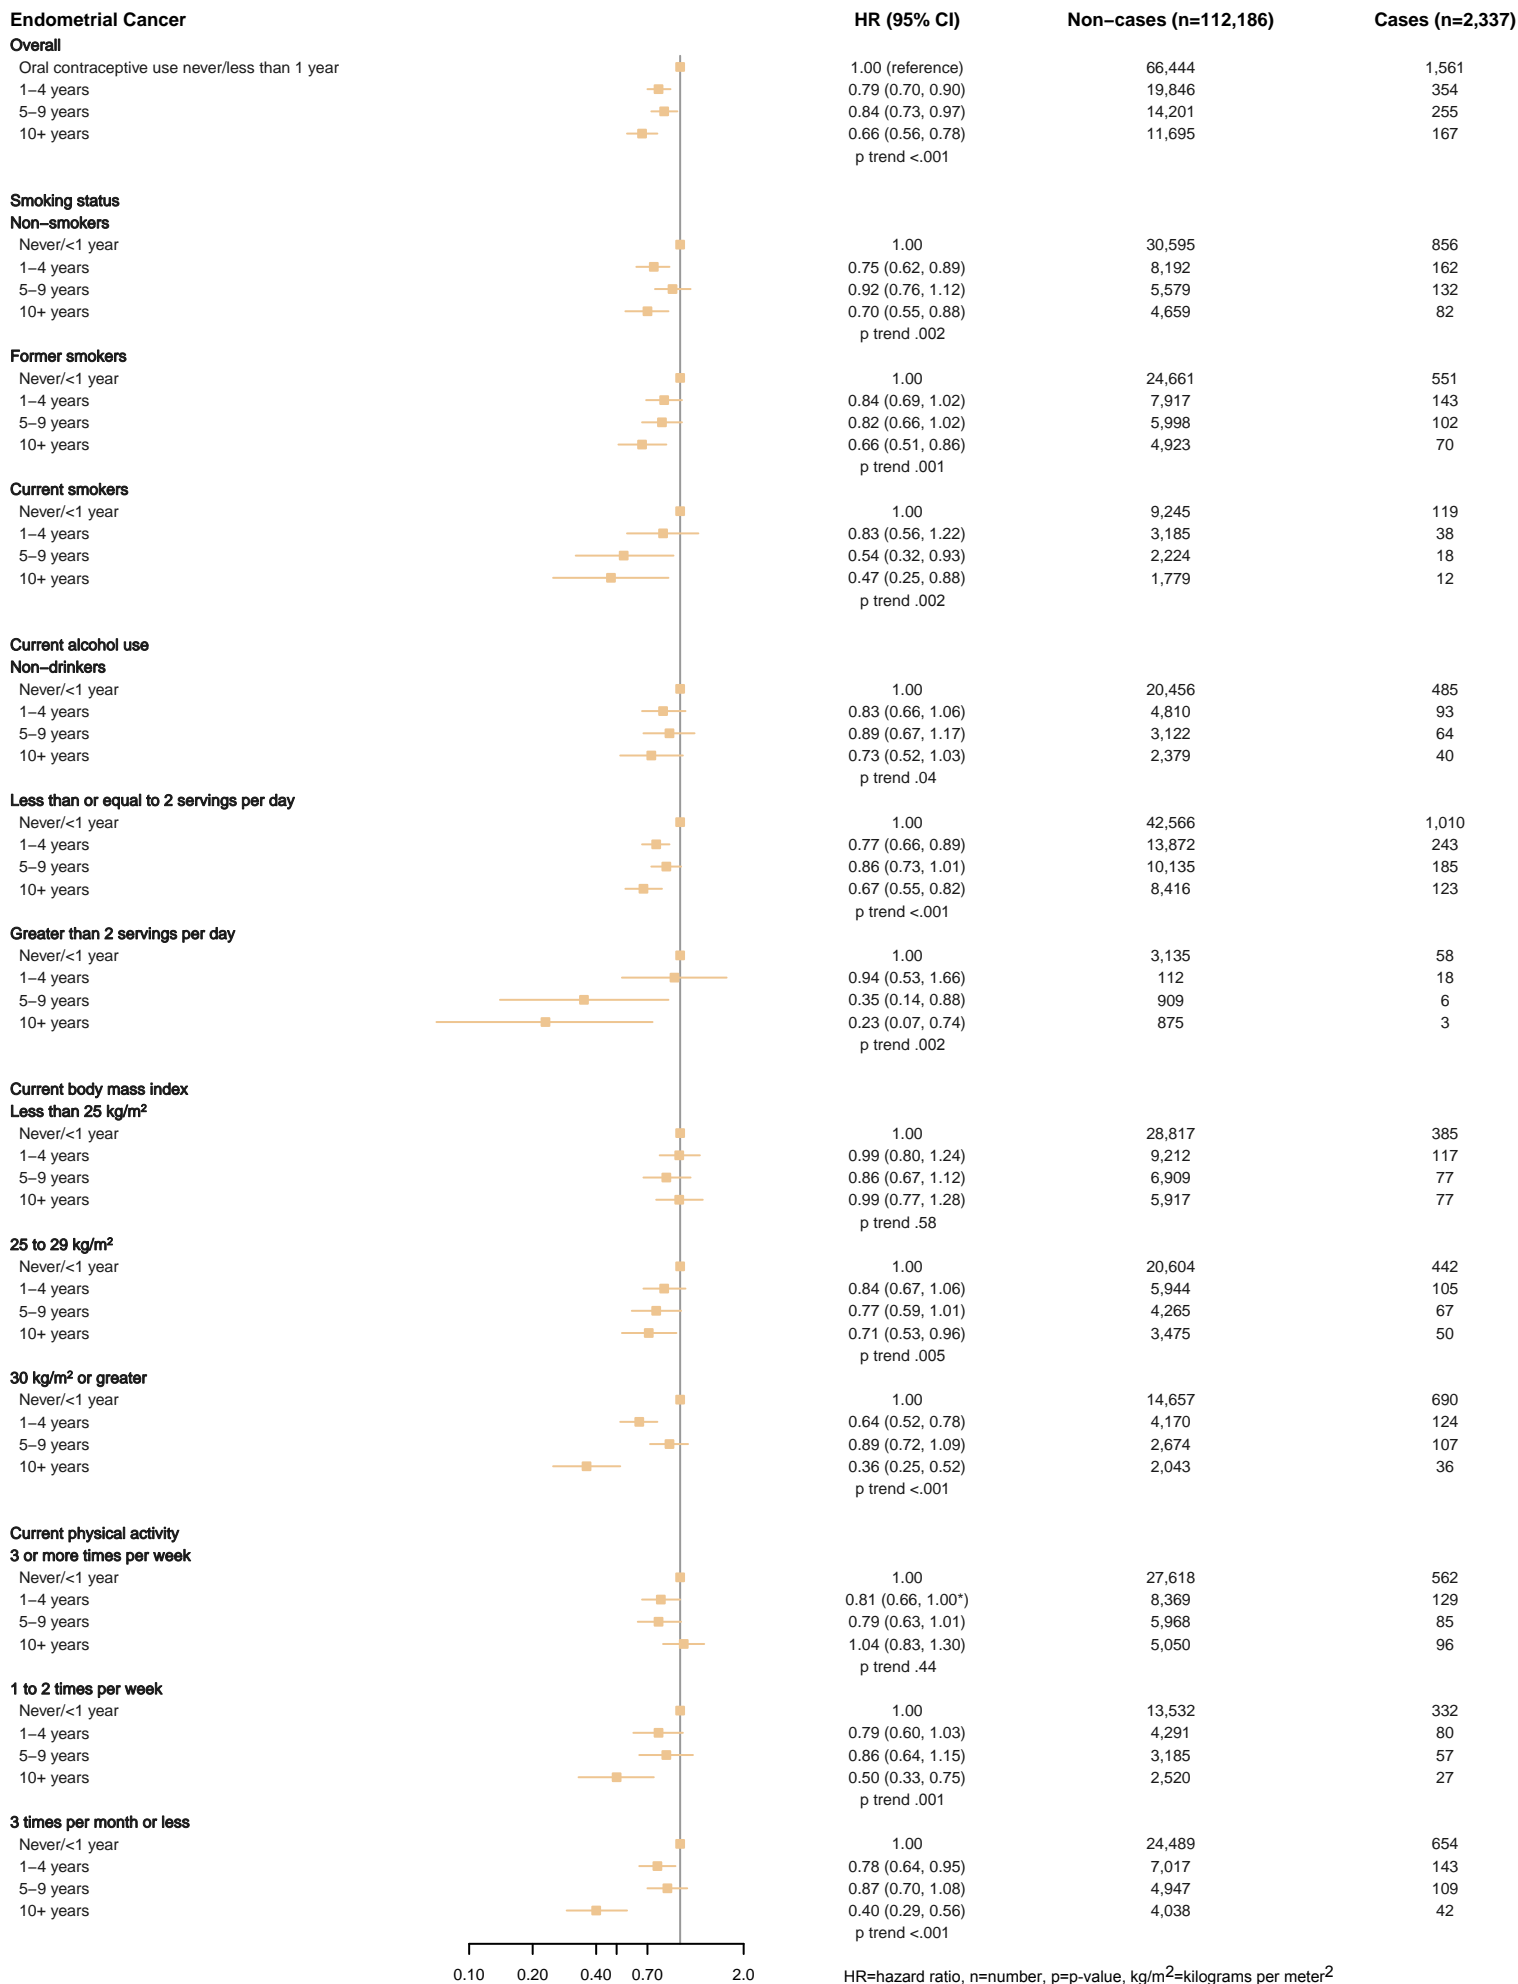

**eFigure 3.** Oral contraceptive use duration and time to breast cancer diagnosis across lifestyle characteristics

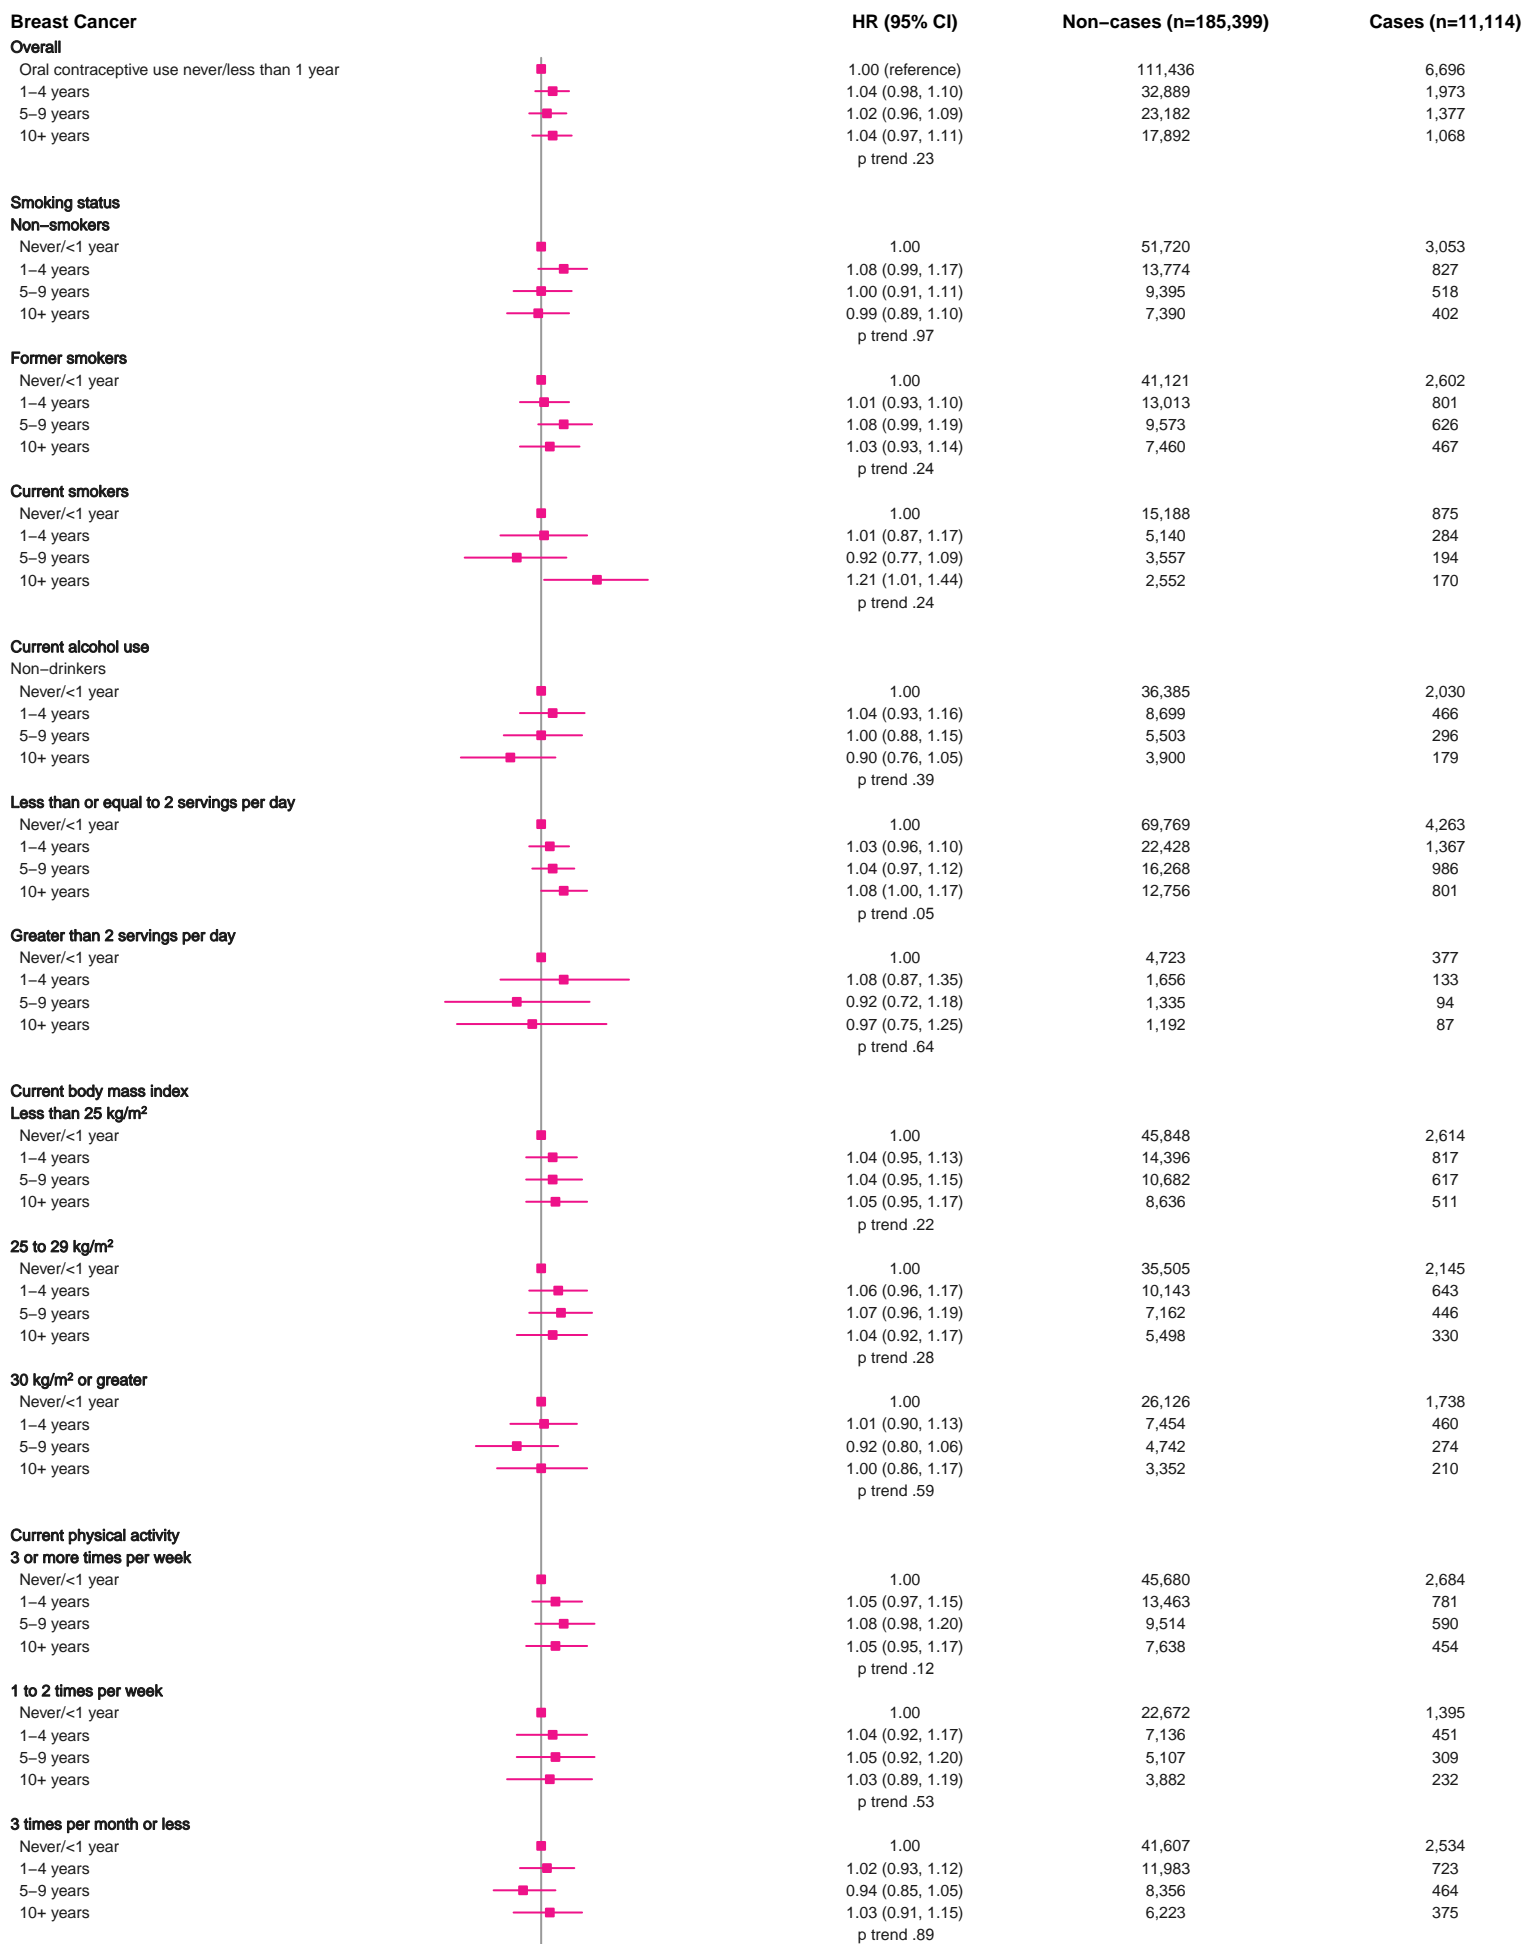

0.70 2.0

HR=hazard ratio, n=number, p=p-value, kg/m<sup>2</sup>=kilograms per meter<sup>2</sup>

Data are from the NIH-AARP Diet and Health Study. Prior oral contraceptive use and lifestyle factors queried at baseline (age 50-71).

**eFigure 4.** Oral contraceptive use duration and time to colorectal cancer diagnosis across lifestyle characteristics

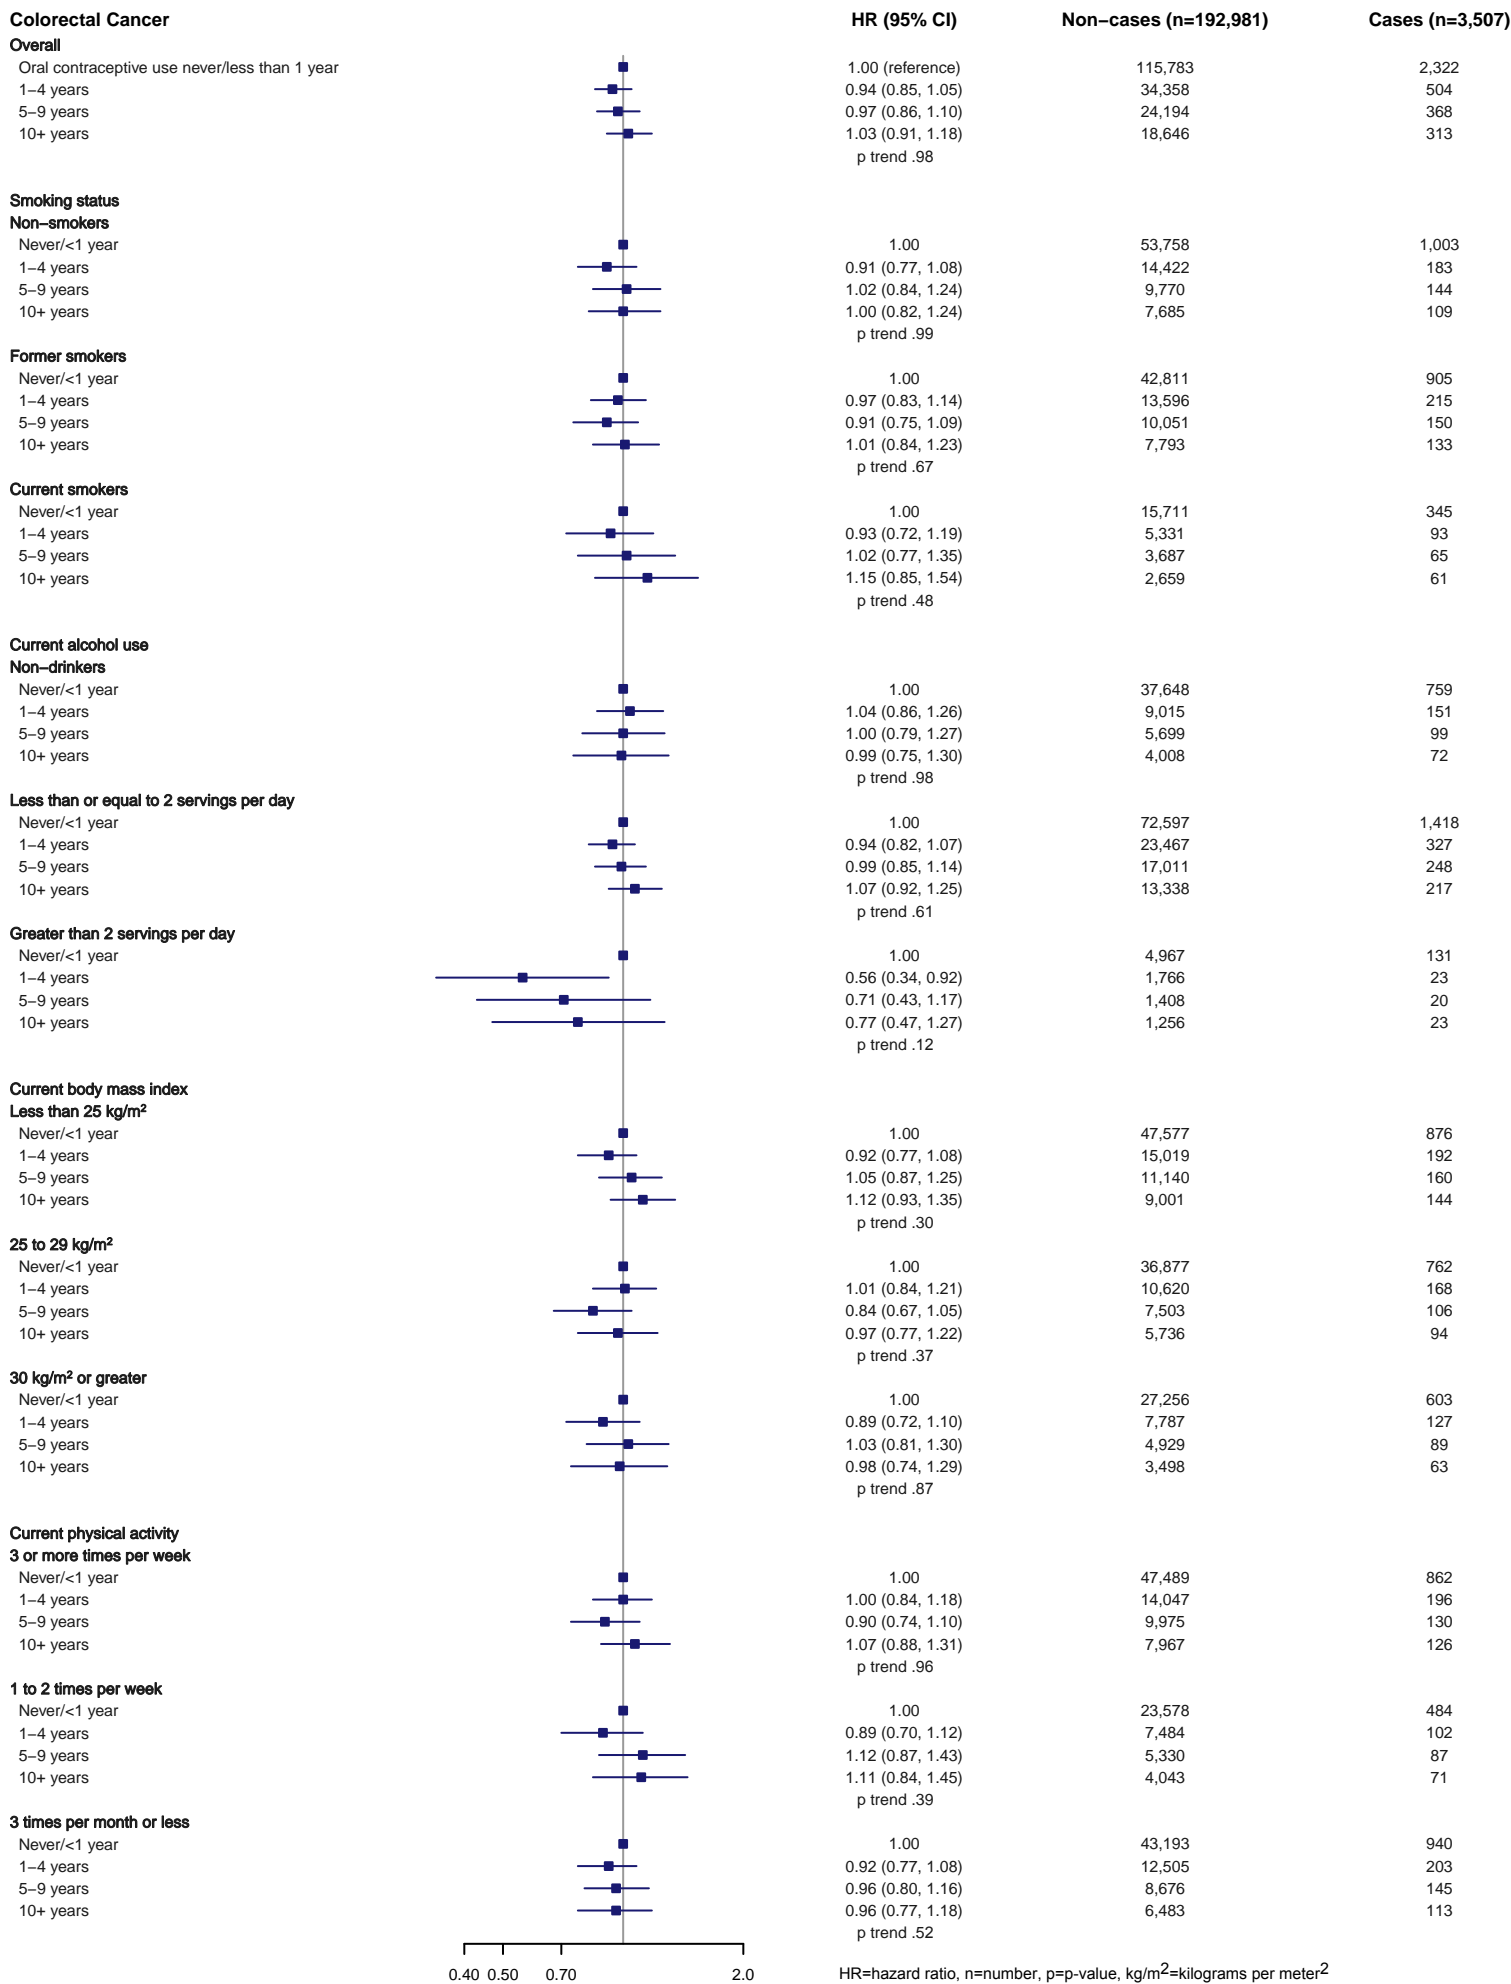

0.40 0.50 0.70 2.0

HR=hazard ratio, n=number, p=p-value, kg/m<sup>2</sup>=kilograms per meter<sup>2</sup>

Data are from the NIH-AARP Diet and Health Study. Prior oral contraceptive use and lifestyle factors queried at baseline (age 50-71).

**eFigure 5.** Oral contraceptive use duration and time to breast (A), colorectal (B), or ovarian (C) cancer diagnosis across family history

**A) Breast Cancer**

**No Family history of breast cancer**

Oral Contraceptive Use Never/<1 year  
1-4 years  
5-9 years  
10+ years

HR (95% CI)

Non-cases (n=185,399)

Cases (n=11,114)

|                   |        |       |
|-------------------|--------|-------|
| 1.00 (reference)  | 92,906 | 5,221 |
| 1.04 (0.98, 1.11) | 27,517 | 1,562 |
| 1.04 (0.97, 1.12) | 19,390 | 1,105 |
| 1.05 (0.97, 1.13) | 15,076 | 854   |

p trend .12

**Family history of breast cancer**

Never/<1 year  
1-4 years  
5-9 years  
10+ years

|                   |        |       |
|-------------------|--------|-------|
| 1.00              | 13,436 | 1,169 |
| 1.02 (0.90, 1.17) | 3,929  | 329   |
| 0.93 (0.80, 1.09) | 2,808  | 217   |
| 1.00 (0.84, 1.18) | 2,089  | 174   |

p trend .67

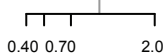

**B) Colorectal Cancer**

**No Family history of colon cancer**

Oral Contraceptive Use Never/<1 year  
1-4 years  
5-9 years  
10+ years

Non-cases (n=192,981)

Cases (n=3,507)

|                   |        |       |
|-------------------|--------|-------|
| 1.00              | 99,356 | 1,961 |
| 0.93 (0.83, 1.04) | 29,647 | 422   |
| 1.00 (0.88, 1.14) | 20,984 | 326   |
| 1.09 (0.95, 1.24) | 16,200 | 280   |

p trend .44

**Family history of colon cancer**

Never/<1 year  
1-4 years  
5-9 years  
10+ years

|                   |        |     |
|-------------------|--------|-----|
| 1.00              | 11,145 | 245 |
| 1.04 (0.76, 1.41) | 3,210  | 57  |
| 0.72 (0.47, 1.09) | 2,182  | 30  |
| 0.62 (0.38, 1.01) | 1,690  | 22  |

p trend .03

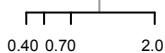

**C) Ovarian Cancer**

**No Family history of ovarian cancer**

Oral Contraceptive Use Never/<1 year  
1-4 years  
5-9 years  
10+ years

Non-cases (n=76,630)

Cases (n=624)

|                   |        |     |
|-------------------|--------|-----|
| 1.00 (reference)  | 41,347 | 380 |
| 0.84 (0.66, 1.07) | 13,173 | 92  |
| 0.79 (0.60, 1.05) | 9,595  | 64  |
| 0.56 (0.39, 0.81) | 7,504  | 37  |

p trend <.001

**Family history of ovarian cancer**

Never/<1 year  
1-4 years  
5-9 years  
10+ years

|                   |       |    |
|-------------------|-------|----|
| 1.00              | 3,008 | 38 |
| 0.60 (0.26, 1.39) | 877   | 8  |
| 0.27 (0.06, 1.14) | 591   | 2  |
| 0.43 (0.13, 1.44) | 535   | 3  |

p trend .03

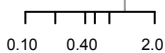

HR=hazard ratio, CI=confidence interval, n=number, p=p-value

Approximately 4.4% of the population was missing information on family history of breast or colon cancer. Information on family history of ovarian cancer was available for 51% of the women in the ovarian cancer analyses (n=77,254).
